# Supplementary material
Source: ML conference proceedings conference paper supplement (https://proceedings.mlr.press/v164/wang22j.html)
Supplement: Supplementary file 1 [file wang22j-supp.zip]

Archive with 7 entries (6 files):
- __MACOSX/._supplementary
- __MACOSX/supplementary/._.DS_Store
- __MACOSX/supplementary/._appendix.pdf
- __MACOSX/supplementary/._video.mp4
- supplementary/
- supplementary/.DS_Store
- supplementary/appendix.pdf
